# Supplementary material for: Early Sexual Intercourse: Prospective Associations with Adolescents Physical Activity and Screen Time
Source: PLOS journal article supplement (doi:10.1371/journal.pone.0158648), 2016-08-11
Supplement: S1 (10.1371/journal.pone.0158648.s001) [file journal.pone.0158648.s001]

1 **S1 Table. Description of the original variables.**

| Variables                   | Items                  | Questions                                                                                             | Response options  | Cutt-offs dichotomous                |
|-----------------------------|------------------------|-------------------------------------------------------------------------------------------------------|-------------------|--------------------------------------|
| Physical Activity Behaviors | Cycling to school      | How many days/week do go to school by bike?                                                           | Zero              | Never                                |
|                             |                        |                                                                                                       | 1 day             | Ever                                 |
|                             |                        |                                                                                                       | 2 days            |                                      |
|                             |                        |                                                                                                       | 3 days            |                                      |
|                             |                        |                                                                                                       | 4 days            |                                      |
|                             |                        |                                                                                                       | 5 days            |                                      |
|                             | Time cycling to school | How long does it take you to cycle to and from school?                                                | < 10 minutes      | < 30 minutes/day<br>≥ 30 minutes/day |
|                             |                        |                                                                                                       | 10-20 minutes     |                                      |
|                             |                        |                                                                                                       | 20-30 minutes     |                                      |
| Screen Time                 | Sports club membership | Are you a member of a sports club?(i.e., whether adolescents had a paid membership of a sports club). | 30 minutes-1 hour | No                                   |
|                             |                        |                                                                                                       | > 1 hour          |                                      |
|                             | Sports outside school  | How many days/week do you participate in sports outside school?                                       | No                | Yes                                  |
|                             |                        |                                                                                                       | Yes               |                                      |
|                             | TV/DVD watching        | How many hours/day do you watch TV/DVDs?                                                              | Zero              | Never                                |
|                             |                        |                                                                                                       | 1 day             |                                      |
|                             |                        |                                                                                                       | 2 days            |                                      |
|                             |                        |                                                                                                       | 3 days            |                                      |
|                             |                        |                                                                                                       | 4 days            |                                      |
|                             |                        |                                                                                                       | 5 days            |                                      |
|                             |                        |                                                                                                       | 6 days            |                                      |
|                             |                        |                                                                                                       | 7 days            |                                      |
|                             |                        |                                                                                                       | Zero              | < 2 hours/day<br>≥ 2 hours/day       |
|                             |                        |                                                                                                       | < 1 hour          |                                      |
|                             |                        |                                                                                                       | 1 hour            |                                      |
|                             |                        |                                                                                                       | 2 hours           |                                      |
|                             |                        |                                                                                                       | 3 hours           |                                      |
|                             |                        |                                                                                                       | 4 hours           |                                      |
|                             |                        |                                                                                                       | 5 hours           |                                      |

| Variables             | Items                    | Questions                                                                                        | Response options                                                                                   | Cutt-offs dichotomous                      |
|-----------------------|--------------------------|--------------------------------------------------------------------------------------------------|----------------------------------------------------------------------------------------------------|--------------------------------------------|
| Screen Time           | Computer use             | How many hours/day do you use a/the? computer (games, internet)?                                 | Zero<br><br>< 1 hour<br>1 hour<br>2 hours<br>3 hours<br>4 hours<br>5 hours                         | < 2 hours/day<br>≥ 2 hours/day             |
| Sexual Behavior       | Early sexual intercourse | Have you ever had sexual intercourse (by sexual intercourse we mean penile-vaginal intercourse)? | No, never<br><br>Yes, 1 time<br>Yes, a couple of times<br>Yes, regularly                           | Never<br><br>Ever                          |
| Potential Confounders | Gender                   | Are you a boy or a girl?                                                                         | Boy<br>Girl                                                                                        | Boy<br>Girl                                |
|                       | Age                      | How old are you?                                                                                 | 11 years<br>12 years<br>13 years<br>14 years<br>15 years<br>16 years<br>17 years<br>≥ 18 years     | 11-12 years<br>13-14 years<br><br>Excluded |
|                       | Educational Level        | Indicate in which class you are and what kind of educational level you follow                    | VMBO-vocational<br><br>VMBO-theoretical<br>VMBO/HAVO<br>HAVO/VWO<br>VWO                            | Low<br>High                                |
|                       | Ethnic Background        | In what country were you born?                                                                   | the Netherlands<br>Suriname<br>Dutch Antilles or Aruba<br>Morocco<br>Turkey<br>Cape Verde<br>Other | Native-Dutch<br>Non-native Dutch           |

| Variables             | Items            | Questions                                | Response options                                                                                                                                                                                                                                                                                        | Cutt-offs dichotomous                                                          |
|-----------------------|------------------|------------------------------------------|---------------------------------------------------------------------------------------------------------------------------------------------------------------------------------------------------------------------------------------------------------------------------------------------------------|--------------------------------------------------------------------------------|
| Potential Confounders | Family Structure | Do you live with your mother and father? | Yes, I live with my father and mother<br>Yes, but sometimes I live with my mother and sometimes with my father<br>No, I live with my father<br>No, I live with my mother<br>No, I live with my father and stepmother/friend<br>No, I live with my mother and stepfather.friend<br>No, I live with other | Living with both biological parents<br>Not living with both biological parents |
|                       | Smoking          | Have you ever smoked (cigarettes)?       | No, I have never smoked<br>Yes, I smoked 1 or 2 times<br>I smoke occasionally<br>I smoke daily                                                                                                                                                                                                          | No<br>Yes                                                                      |
|                       | Alcohol          | Do you sometimes drink alcohol?          | No, never<br>Yes, sometimes                                                                                                                                                                                                                                                                             | No<br>Yes                                                                      |
|                       | Marijuana        | Have you ever used marijuana?            | Never<br>1-2 times<br>3-4 times<br>5-6 times<br>7-10 times                                                                                                                                                                                                                                              | No<br>Yes                                                                      |
|                       |                  |                                          |                                                                                                                                                                                                                                                                                                         |                                                                                |
